# Supplementary material for: Integration of transcriptomic and cytoarchitectonic data implicates a role for MAOA and TAC1 in the limbic-cortical network
Source: Springer Nature journal article supplement (doi:10.1007/s00429-018-1620-6), 2018-02-24

a)

### 25 Genes (All-probes mode)

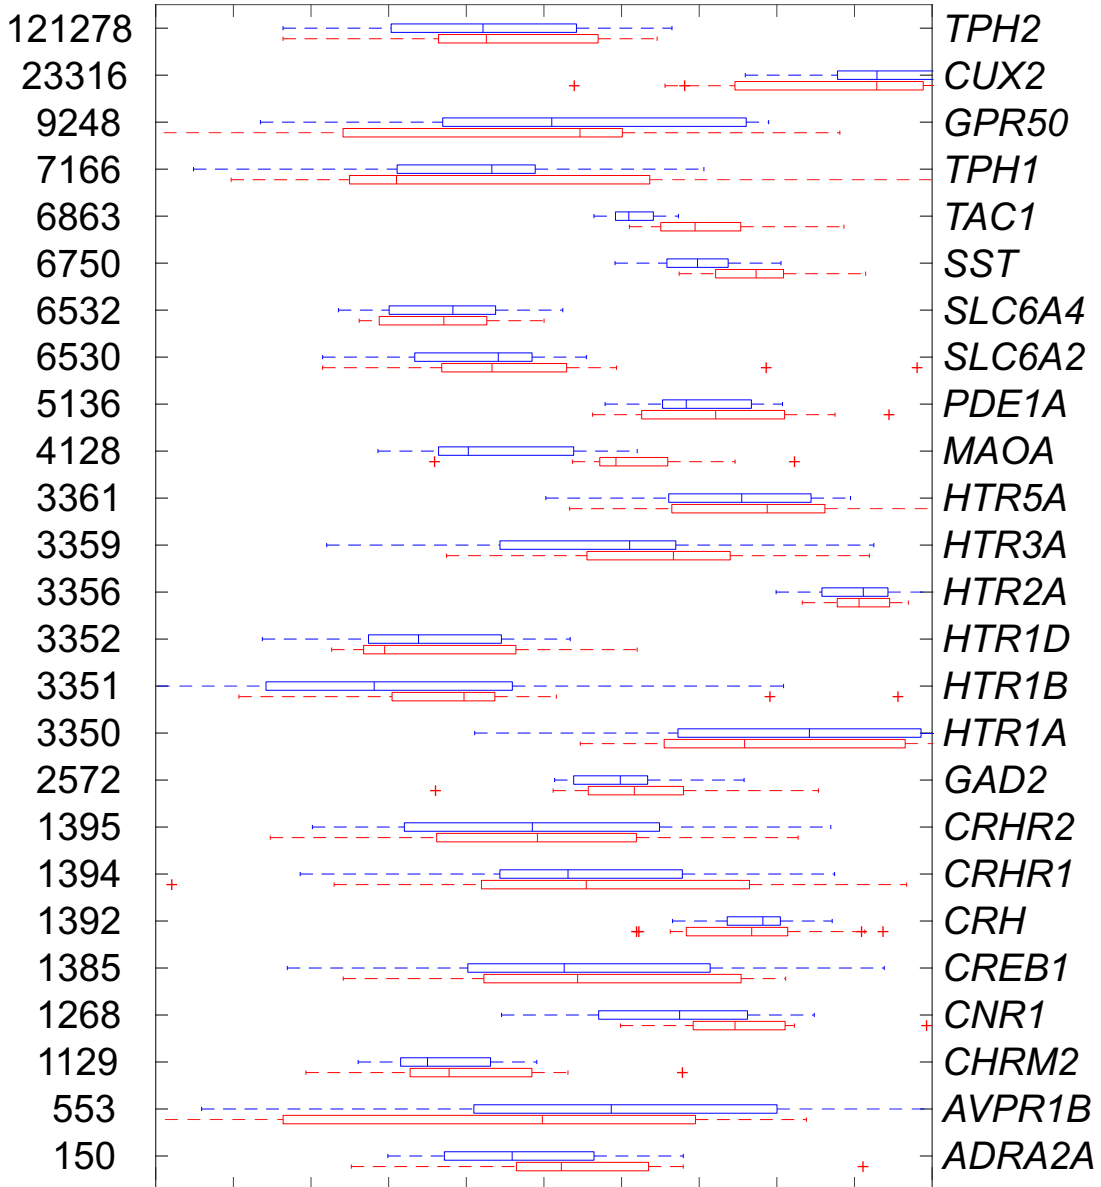

b)

### TAC1 (Single-probe mode)

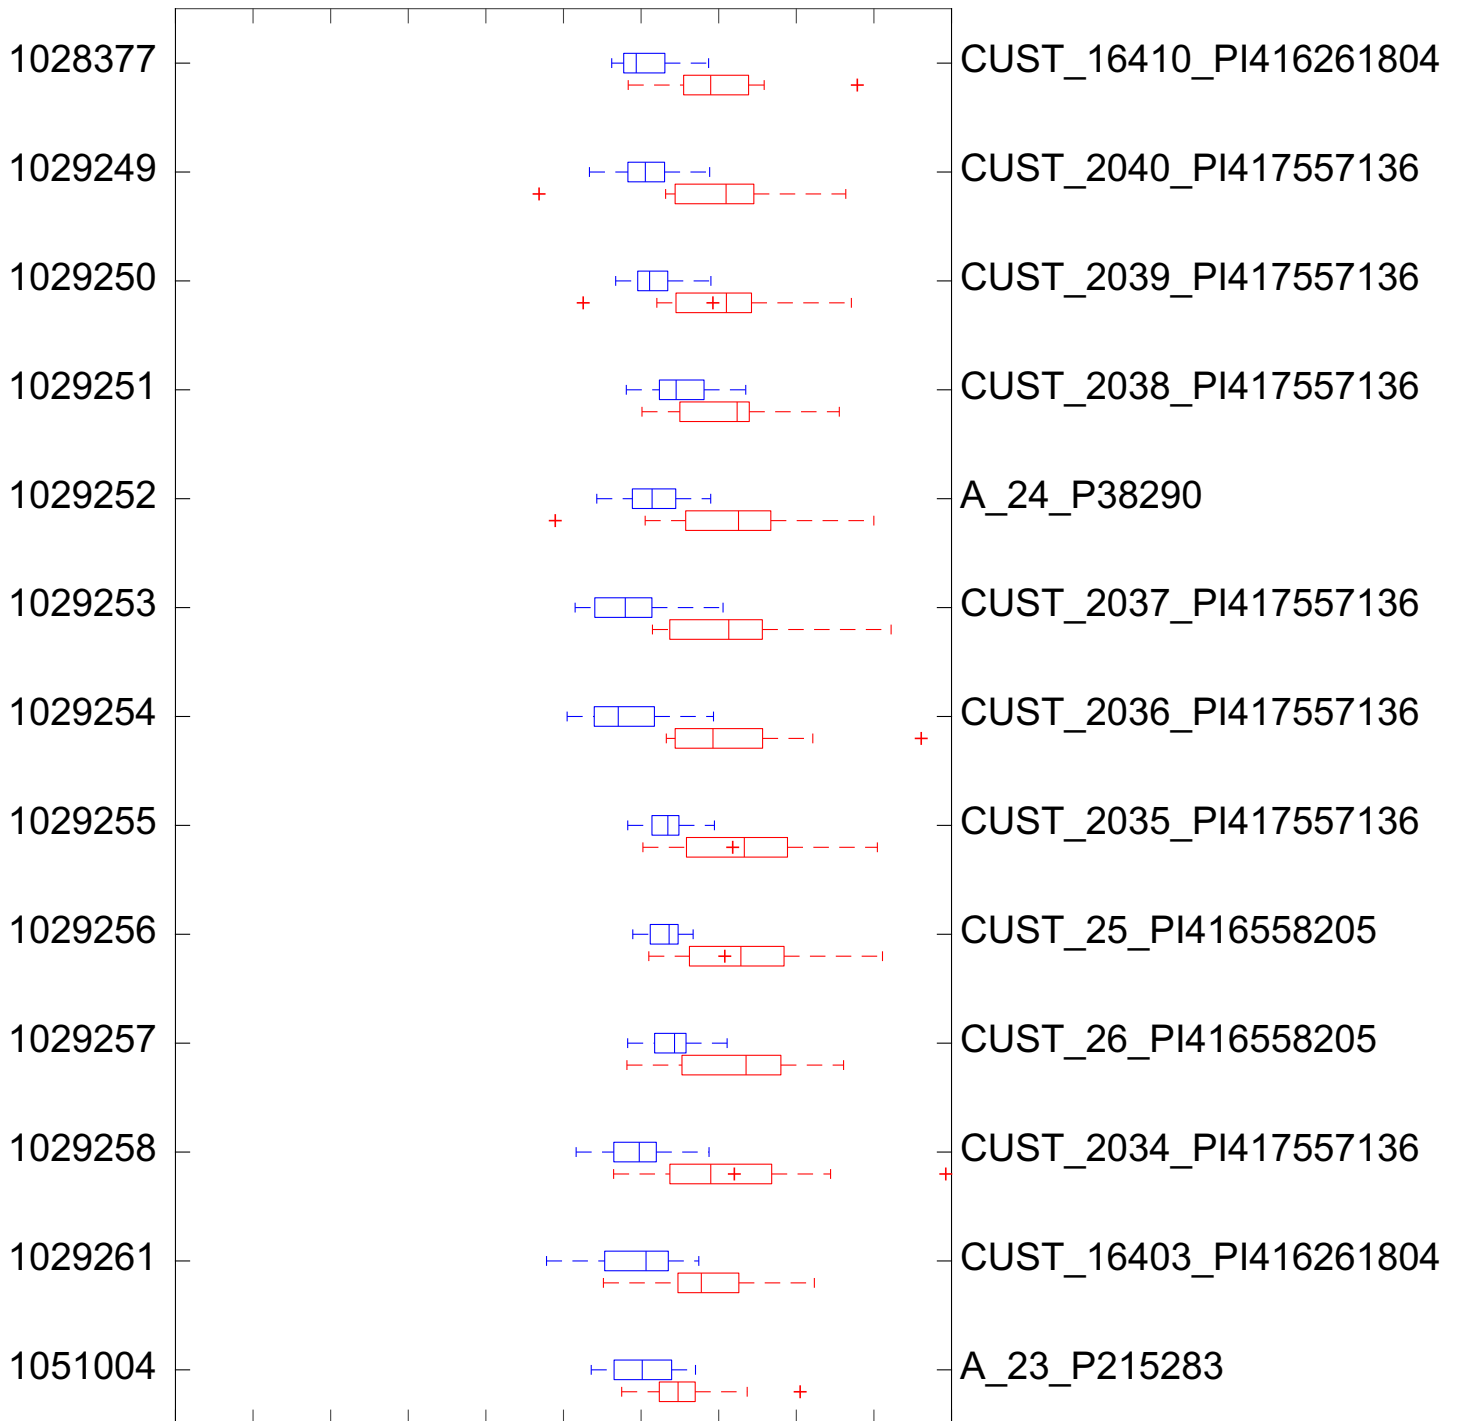

c)

### MAOA (Single-probe mode)

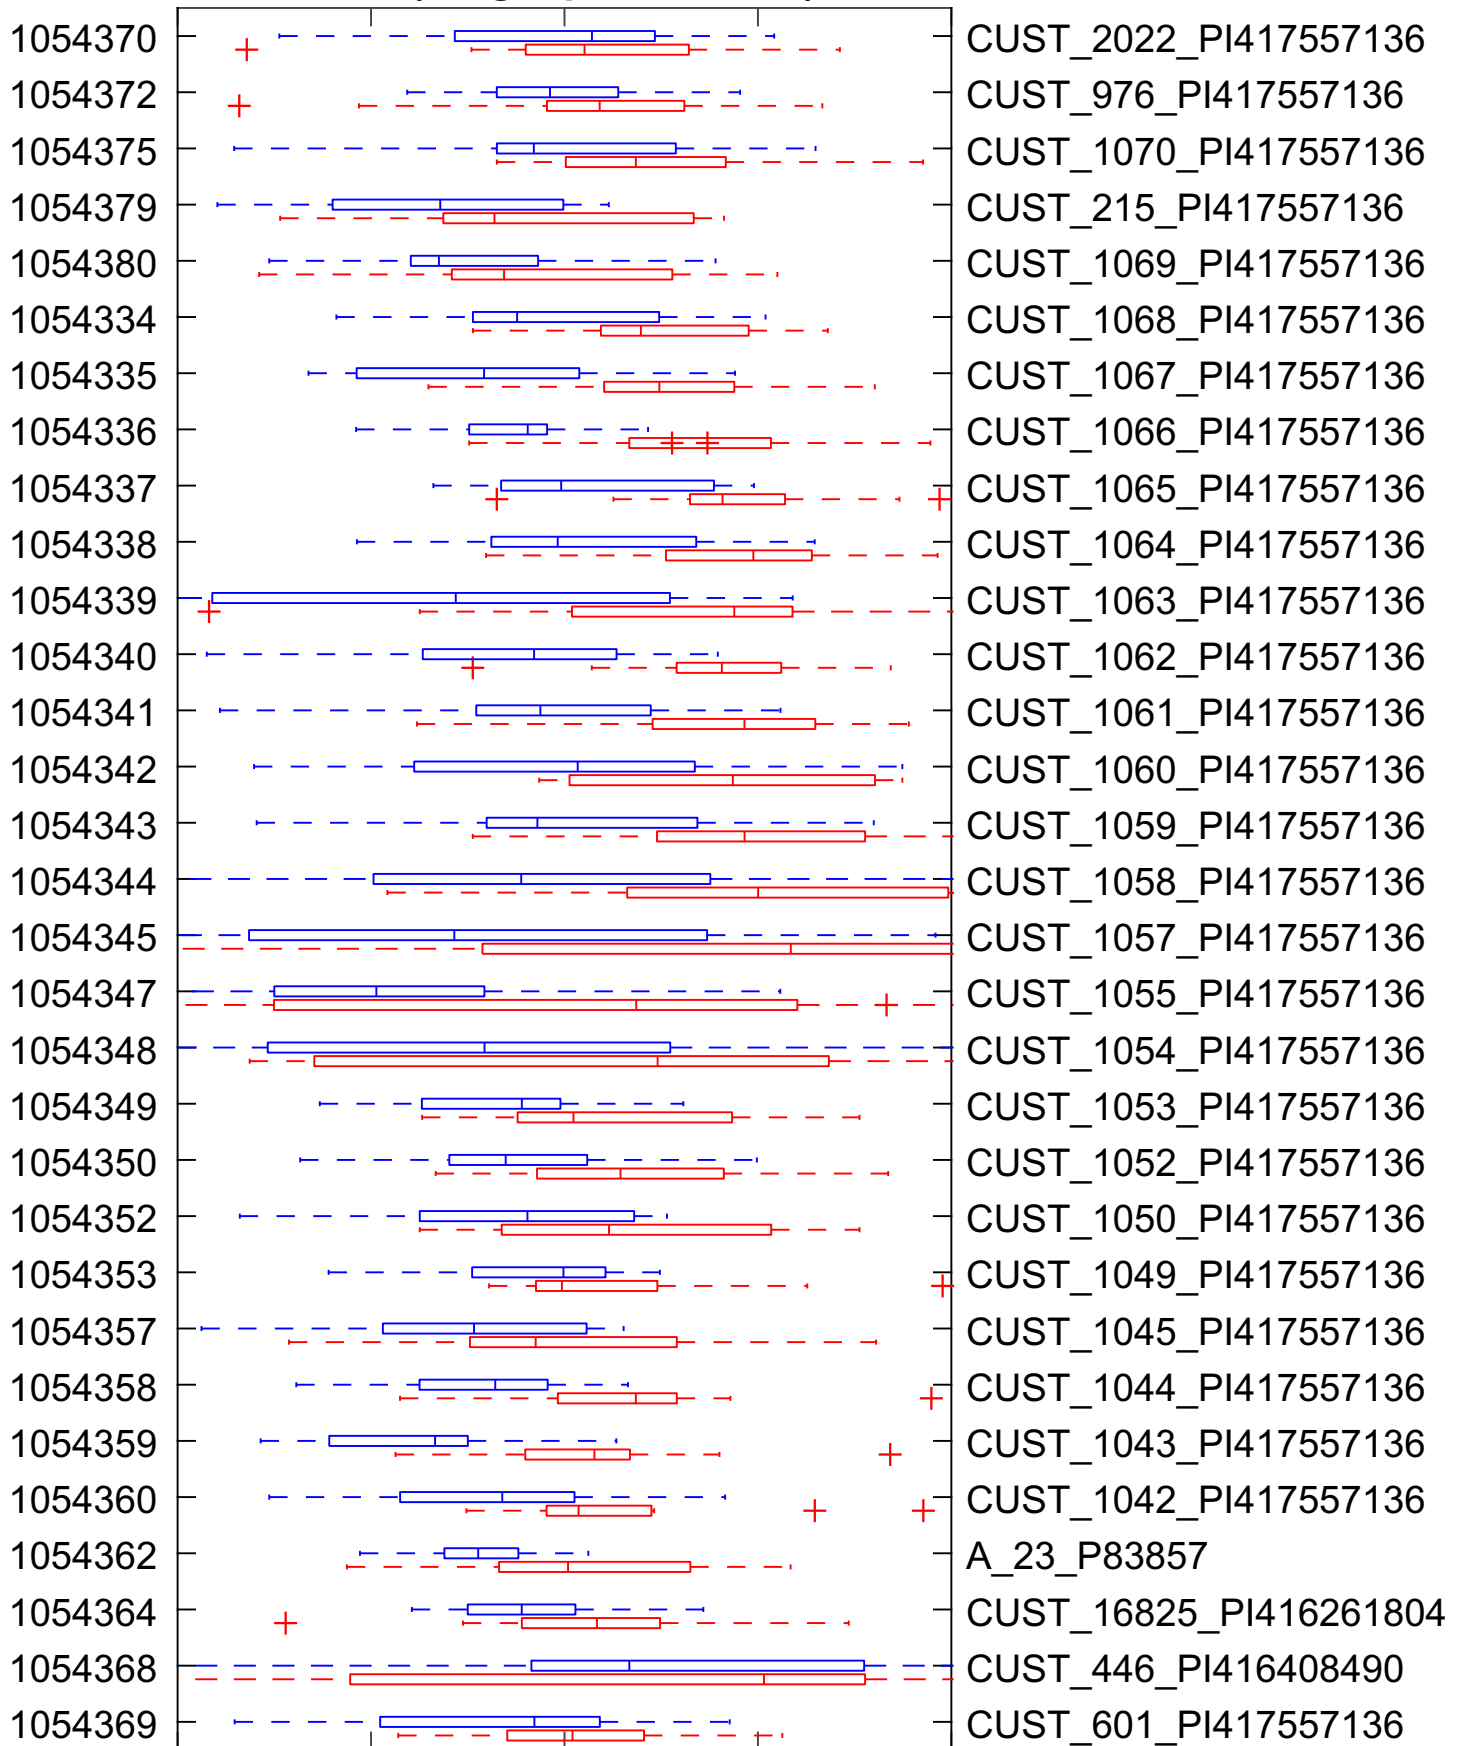

Supplement: MOESM2 [file 15488862]
