# Supplementary material for: Integration of transcriptomic and cytoarchitectonic data implicates a role for MAOA and TAC1 in the limbic-cortical network
Source: Springer Nature journal article supplement (doi:10.1007/s00429-018-1620-6), 2018-02-24
Supplement: MOESM4 [file 15488862]

a)

**The 25 MDD genes**

probe\_id, gene\_symbol, entrez\_id

1059351, "ADRA2A", 150

1059352, "ADRA2A", 150

1059353, "ADRA2A", 150

1058915, "AVPR1B", 553

1058914, "AVPR1B", 553

1058916, "AVPR1B", 553

1029156, "CHRM2", 1129

1029155, "CHRM2", 1129

1029150, "CHRM2", 1129

1029149, "CHRM2", 1129

1029146, "CHRM2", 1129

1029142, "CHRM2", 1129

1029138, "CHRM2", 1129

1029136, "CHRM2", 1129

1029135, "CHRM2", 1129

1029134, "CHRM2", 1129

1029133, "CHRM2", 1129

1029126, "CHRM2", 1129

1029125, "CHRM2", 1129

1029124, "CHRM2", 1129

1029123, "CHRM2", 1129

1029122, "CHRM2", 1129

1029121, "CHRM2", 1129

1025133, "CHRM2", 1129

1023492, "CHRM2", 1129

1029129,"CHRM2",1129  
1029128,"CHRM2",1129  
1029127,"CHRM2",1129  
1028516,"CNR1",1268  
1028515,"CNR1",1268  
1028514,"CNR1",1268  
1028513,"CNR1",1268  
1028512,"CNR1",1268  
1028511,"CNR1",1268  
1028510,"CNR1",1268  
1028509,"CNR1",1268  
1028508,"CNR1",1268  
1028507,"CNR1",1268  
1028506,"CNR1",1268  
1028505,"CNR1",1268  
1028504,"CNR1",1268  
1028503,"CNR1",1268  
1028502,"CNR1",1268  
1028484,"CNR1",1268  
1028483,"CNR1",1268  
1028478,"CNR1",1268  
1028477,"CNR1",1268  
1028474,"CNR1",1268  
1028473,"CNR1",1268  
1028472,"CNR1",1268  
1028471,"CNR1",1268  
1028470,"CNR1",1268  
1028469,"CNR1",1268

1028466,"CNR1",1268  
1028465,"CNR1",1268  
1028464,"CNR1",1268  
1028462,"CNR1",1268  
1028461,"CNR1",1268  
1028458,"CNR1",1268  
1028457,"CNR1",1268  
1028456,"CNR1",1268  
1028455,"CNR1",1268  
1028454,"CNR1",1268  
1028453,"CNR1",1268  
1028452,"CNR1",1268  
1028451,"CNR1",1268  
1028450,"CNR1",1268  
1028448,"CNR1",1268  
1028447,"CNR1",1268  
1028446,"CNR1",1268  
1028445,"CNR1",1268  
1028444,"CNR1",1268  
1028442,"CNR1",1268  
1028441,"CNR1",1268  
1028440,"CNR1",1268  
1028439,"CNR1",1268  
1028438,"CNR1",1268  
1028437,"CNR1",1268  
1028434,"CNR1",1268  
1028433,"CNR1",1268  
1028432,"CNR1",1268

1028431,"CNR1",1268  
1028430,"CNR1",1268  
1028429,"CNR1",1268  
1028428,"CNR1",1268  
1028427,"CNR1",1268  
1028426,"CNR1",1268  
1028425,"CNR1",1268  
1028424,"CNR1",1268  
1015329,"CNR1",1268  
1028436,"CNR1",1268  
1028435,"CNR1",1268  
1028501,"CNR1",1268  
1028500,"CNR1",1268  
1028499,"CNR1",1268  
1028498,"CNR1",1268  
1028497,"CNR1",1268  
1028494,"CNR1",1268  
1028493,"CNR1",1268  
1028492,"CNR1",1268  
1028491,"CNR1",1268  
1028490,"CNR1",1268  
1028489,"CNR1",1268  
1028488,"CNR1",1268  
1028487,"CNR1",1268  
1028486,"CNR1",1268  
1028485,"CNR1",1268  
1028548,"CNR1",1268  
1028547,"CNR1",1268

1028542,"CNR1",1268  
1028536,"CNR1",1268  
1028535,"CNR1",1268  
1028534,"CNR1",1268  
1028527,"CNR1",1268  
1028526,"CNR1",1268  
1028518,"CNR1",1268  
1028517,"CNR1",1268  
1057976,"CREB1",1385  
1057975,"CREB1",1385  
1057974,"CREB1",1385  
1059659,"CREB1",1385  
1057967,"CRH",1392  
1057966,"CRH",1392  
1057965,"CRH",1392  
1019360,"CRHR1",1394  
1019310,"CRHR1",1394  
1013314,"CRHR1",1394  
1011485,"CRHR1",1394  
1057962,"CRHR2",1395  
1057961,"CRHR2",1395  
1057960,"CRHR2",1395  
1028346,"CUX2",23316  
1028345,"CUX2",23316  
1028344,"CUX2",23316  
1056548,"GAD2",2572  
1056547,"GAD2",2572  
1056546,"GAD2",2572

1056545,"GAD2",2572  
1056544,"GAD2",2572  
1013593,"GAD2",2572  
1013489,"GAD2",2572  
1013359,"GAD2",2572  
1013692,"GAD2",2572  
1012504,"GAD2",2572  
1012098,"GAD2",2572  
1011320,"GAD2",2572  
1011137,"GAD2",2572  
1010770,"GAD2",2572  
1010725,"GAD2",2572  
1010443,"GAD2",2572  
1010639,"GAD2",2572  
1056550,"GAD2",2572  
1048801,"GPR50",9248  
1048800,"GPR50",9248  
1024804,"HTR1A",3350  
1024803,"HTR1A",3350  
1024812,"HTR1A",3350  
1055392,"HTR1B",3351  
1055381,"HTR1B",3351  
1055378,"HTR1B",3351  
1055374,"HTR1D",3352  
1055373,"HTR1D",3352  
1055372,"HTR1D",3352  
1055361,"HTR1D",3352  
1055357,"HTR1D",3352

1055356,"HTR1D",3352  
1055355,"HTR1D",3352  
1055354,"HTR1D",3352  
1055347,"HTR1D",3352  
1055346,"HTR1D",3352  
1055345,"HTR1D",3352  
1055342,"HTR1D",3352  
1055377,"HTR1D",3352  
1024617,"HTR3A",3359  
1024606,"HTR3A",3359  
1024594,"HTR3A",3359  
1024593,"HTR3A",3359  
1024592,"HTR3A",3359  
1021988,"HTR5A",3361  
1021983,"HTR5A",3361  
1021982,"HTR5A",3361  
1021981,"HTR5A",3361  
1021979,"HTR5A",3361  
1021975,"HTR5A",3361  
1021974,"HTR5A",3361  
1021973,"HTR5A",3361  
1021972,"HTR5A",3361  
1021970,"HTR5A",3361  
1021969,"HTR5A",3361  
1021968,"HTR5A",3361  
1054369,"MAOA",4128  
1054368,"MAOA",4128  
1054364,"MAOA",4128

1054362,"MAOA",4128  
1054360,"MAOA",4128  
1054359,"MAOA",4128  
1054358,"MAOA",4128  
1054357,"MAOA",4128  
1054353,"MAOA",4128  
1054352,"MAOA",4128  
1054350,"MAOA",4128  
1054349,"MAOA",4128  
1054348,"MAOA",4128  
1054347,"MAOA",4128  
1054345,"MAOA",4128  
1054344,"MAOA",4128  
1054343,"MAOA",4128  
1054342,"MAOA",4128  
1054341,"MAOA",4128  
1054340,"MAOA",4128  
1054339,"MAOA",4128  
1054338,"MAOA",4128  
1054337,"MAOA",4128  
1054336,"MAOA",4128  
1054335,"MAOA",4128  
1054334,"MAOA",4128  
1054380,"MAOA",4128  
1054379,"MAOA",4128  
1054375,"MAOA",4128  
1054372,"MAOA",4128  
1054370,"MAOA",4128



1053289,"PDE1A",5136  
1053288,"PDE1A",5136  
1053287,"PDE1A",5136  
1063261,"PDE1A",5136  
1023147,"SLC6A2",6530  
1023146,"SLC6A2",6530  
1051465,"SLC6A4",6532  
1051464,"SLC6A4",6532  
1051461,"SLC6A4",6532  
1051460,"SLC6A4",6532  
1051459,"SLC6A4",6532  
1051458,"SLC6A4",6532  
1051457,"SLC6A4",6532  
1051489,"SLC6A4",6532  
1051483,"SLC6A4",6532  
1051472,"SLC6A4",6532  
1051466,"SLC6A4",6532  
1025754,"SST",6750  
1025749,"SST",6750  
1025748,"SST",6750  
1025747,"SST",6750  
1051004,"TAC1",6863  
1029261,"TAC1",6863  
1029258,"TAC1",6863  
1029257,"TAC1",6863  
1029256,"TAC1",6863  
1029255,"TAC1",6863  
1029254,"TAC1",6863

1029253,"TAC1",6863  
1029252,"TAC1",6863  
1029251,"TAC1",6863  
1029250,"TAC1",6863  
1029249,"TAC1",6863  
1028377,"TAC1",6863  
1050663,"TPH1",7166  
1050662,"TPH1",7166  
1050661,"TPH1",7166  
1035832,"TPH2",121278  
1035831,"TPH2",121278  
1028612,"HTR2A",3356  
1028611,"HTR2A",3356  
1028610,"HTR2A",3356  
1028609,"HTR2A",3356  
1028608,"HTR2A",3356  
1028607,"HTR2A",3356  
1028606,"HTR2A",3356  
1028605,"HTR2A",3356  
1028604,"HTR2A",3356  
1028603,"HTR2A",3356  
1028602,"HTR2A",3356  
1028601,"HTR2A",3356  
1028634,"HTR2A",3356  
1028633,"HTR2A",3356  
1028631,"HTR2A",3356  
1028627,"HTR2A",3356  
1028626,"HTR2A",3356

1028625,"HTR2A",3356  
1028620,"HTR2A",3356  
1028619,"HTR2A",3356  
1028618,"HTR2A",3356  
1028617,"HTR2A",3356  
1028615,"HTR2A",3356  
1028614,"HTR2A",3356  
1028613,"HTR2A",3356

b)

**The 25 random genes**

probe\_id, gene\_symbol, entrez\_id

1039532,"C8orf33",65265  
1039531,"C8orf33",65265  
1039530,"C8orf33",65265  
1046477,"FZD10",11211  
1046476,"FZD10",11211  
1047556,"TNIP1",10318  
1047555,"TNIP1",10318  
1020557,"C9orf84",158401  
1015178,"C9orf84",158401  
1015147,"C9orf84",158401  
1021638,"61E3.4",440345  
1014742,"61E3.4",440345  
1011169,"61E3.4",440345  
1011981,"61E3.4",440345  
1069865,"61E3.4",440345  
1019428,"ASAH1",427

1032727,"ASPM",259266  
1032726,"ASPM",259266  
1032725,"ASPM",259266  
1045100,"PTCD1",26024  
1045099,"PTCD1",26024  
1045844,"FBXW11",23291  
1045843,"FBXW11",23291  
1026527,"CBFB",865  
1026526,"CBFB",865  
1044801,"GREM1",26585  
1044800,"GREM1",26585  
1019663,"CERKL",375298  
1013827,"CERKL",375298  
1013746,"CERKL",375298  
1041456,"LENEP",55891  
1041455,"LENEP",55891  
1033718,"HTR3C",170572  
1033713,"HTR3C",170572  
1033704,"HTR3C",170572  
1033702,"HTR3C",170572  
1033701,"HTR3C",170572  
1033700,"HTR3C",170572  
1056207,"GPS2",2874  
1056206,"GPS2",2874  
1032891,"LCE5A",254910  
1032890,"LCE5A",254910  
1014716,"AC002472.9",439931  
1014210,"AC002472.9",439931

1012353,"AC002472.9",439931  
1032756,"KLHL34",257240  
1032755,"KLHL34",257240  
1057292,"ELAVL2",1993  
1057291,"ELAVL2",1993  
1015679,"SSR4P1",728039  
1013573,"SSR4P1",728039  
1031320,"OR5D13",390142  
1031319,"OR5D13",390142  
1042732,"FNDC8",54752  
1042731,"FNDC8",54752  
1042092,"TMEM206",55248  
1042091,"TMEM206",55248  
1056459,"GDF2",2658  
1056458,"GDF2",2658  
1047601,"SIGMAR1",10280  
1047600,"SIGMAR1",10280

c)

**The 14 color genes**

probe\_id, gene\_symbol, entrez\_id

1059034,"ASIP",434  
1059033,"ASIP",434  
1042687,"BNC2",54796  
1042685,"BNC2",54796  
1042684,"BNC2",54796  
1042686,"BNC2",54796  
1049193,"EIF2S2",8894

1049192,"EIF2S2",8894  
1049191,"EIF2S2",8894  
1049190,"EIF2S2",8894  
1055897,"GSS",2937  
1055896,"GSS",2937  
1049158,"HERC2",8924  
1054961,"IRF4",3662  
1054960,"IRF4",3662  
1054275,"MC1R",4157  
1054274,"MC1R",4157  
1054273,"MC1R",4157  
1053495,"OCA2",4948  
1053494,"OCA2",4948  
1024061,"RALY",22913  
1024060,"RALY",22913  
1024059,"RALY",22913  
1027233,"SLC24A4",123041  
1027232,"SLC24A4",123041  
1032553,"SLC24A5",283652  
1032552,"SLC24A5",283652  
1043703,"SLC45A2",51151  
1043702,"SLC45A2",51151  
1050524,"TYR",7299  
1050523,"TYR",7299  
1050522,"TYR",7299  
1019628,"VASH2",79805  
1015046,"VASH2",79805  
1014927,"VASH2",79805

| <b>Year</b> | <b>Journal</b>                       | <b>Trait</b> | <b>PMID</b> | <b>Implicated genes</b>                             |
|-------------|--------------------------------------|--------------|-------------|-----------------------------------------------------|
| 2015        | Journal of Investigative Dermatology | skin color   | 25705849    | IRF4, MC1R, ASIP, RALY, BNC2                        |
| 2015        | Human Genetics                       | skin color   | 25963972    | ASIP, SLC45A2, IRF4, HERC2, OCA2, MC1R, EIF2S2, GSS |
| 2016        | Nature Communications                | hair color   | 26926045    | SLC45A2, IRF4, TYR, HERC2, SLC24A5                  |
| 2013        | Human Molecular Genetics             | eye color    | 23548203    | SLC24A4, HERC2, VASH2                               |
| 2010        | PLOS Genetics                        | hair color   | 20585627    | OCA2, IRF4, SLC45A2, SLC24A4, MC1R                  |
| 2010        | PLOS Genetics                        | red hair     | 20585627    | MC1R, ASIP                                          |
| 2010        | PLOS Genetics                        | eye color    | 20585627    | OCA2, SLC24A4, IRF4, SLC45A2, TYR                   |
| 2010        | PLOS Genetics                        | green eyes   | 20585627    | OCA2, SLC24A4, TYR                                  |
