# Supplementary material for: Integration of transcriptomic and cytoarchitectonic data implicates a role for MAOA and TAC1 in the limbic-cortical network
Source: Springer Nature journal article supplement (doi:10.1007/s00429-018-1620-6), 2018-02-24
Supplement: MOESM6 [file 15488862]

>>>

```
#####  
####      Gene-level Analysis      #####  
####  
####      Single-probe mode        #####  
#####
```

-- n-way ANOVA with user-specified permutations (n= 10,000)

| Index | Probe_name            | Entrez_ID | Gene_Symbol | p_FWE_corrected |
|-------|-----------------------|-----------|-------------|-----------------|
| 249   | CUST_2036_PI417557136 | 686       | "TAC1"      | 0.0475          |

Number of tissue blocks in Fp2 : 12  
Number of tissue blocks in Fp1 : 18  
Sum of tissue blocks : 30  
Sum of oligoprobes : 285  
Number of permutations : 10,000

Elapsed time is 6561.626481 seconds.
